# Supplementary material for: A Survey of the Radiation Exposure Protection of Health Care Providers during Endoscopic Retrograde Cholangiopancreatography in Korea
Source: PubMed Central journal article supplement — Gut Liver. 2012 Nov 13;7(1):100–5. doi: 10.5009/gnl.2013.7.1.100 (PMC3572309; doi:10.5009/gnl.2013.7.1.100), 2012-11-13
Supplement: gnl-7-100-s001.pdf [file gnl-7-100-s001.pdf]

**Appendix.** The recommendation for endoscopic retrograde cholangiopancreatography-related radiation protection by the Korean Pancreatobiliary Association.

ERCP (관련) 방사선 피해방지 권고사항

제정: 2009년 4월 18일

1. ERCP 시술의사는 방사선 위험성과 관련된 방사선의 기본적인 생리와 방사선 피폭에 따른 인체 유해성에 관하여 숙지한다.
2. ERCP 시술 동안 발생하는 노출 방사선의 종류와 방호에 관하여 숙지한다.
3. 투시 시간을 최대한 단축하여, 방사선 노출량을 최소화한다.
4. (방사선) 광원과의 거리를 최대한 멀리 유지한다.
5. 주 시술자 및 보조 시술자는 반드시 납옷을 착용한다. 납옷은 시술자 신체의 측면 및 후면까지 모두 감싸야 되며, 시술 후 탈의된 납복은 접히거나 구겨지지 않게 전용 거치대에 보관한다.
6. 주 시술자 및 보조 시술자는 반드시 갑상선 보호대를 착용한다.
7. 주 시술자 및 보조 시술자는 반드시 납안경을 착용한다.
8. 시술자와 환자 사이에 납으로 구성된 차단막을 설치하여, 높은 에너지의 산란파를 방호한다.
9. 피폭량측정장치는 시술 시 항상 착용하고, 피폭량은 최소 3개월 주기로 확인한다.

대한체담도학회
